# Supplementary material
Source: PubMed Central journal article supplement (PMC3097278)
Supplement: NIHMS260956-supplement-01.pdf [file NIHMS260956-supplement-01.pdf]

**Table 1 Supplemental Digital Content: Demographics of Patient Population**

|                                                  | Study Patients<br>No. (%)<br>n=877 |
|--------------------------------------------------|------------------------------------|
| Sex                                              |                                    |
| Male                                             | 460 (52.5)                         |
| Age                                              |                                    |
| ≤ 1 year                                         | 337 (38.4)                         |
| > 1 and ≤ 5 years                                | 352 (40.1)                         |
| > 5 and ≤ 12 years                               | 143 (16.3)                         |
| >12 years                                        | 45 (5.1)                           |
| Race                                             |                                    |
| Non-Hispanic White                               | 174 (19.8)                         |
| Non-Hispanic Black                               | 605 (69.0)                         |
| Hispanic                                         | 32 (3.7)                           |
| Other                                            | 66 (7.5)                           |
| Asthma Severity                                  |                                    |
| No asthma                                        | 521 (59.4)                         |
| Intermittent                                     | 87 (9.9)                           |
| Mild persistent                                  | 112 (12.8)                         |
| Moderate/severe                                  | 73 (8.3)                           |
| Unknown severity                                 | 84 (9.6)                           |
| Pneumococcal vaccine status                      |                                    |
| None                                             | 65 (7.4)                           |
| Partial                                          | 257 (29.3)                         |
| Complete                                         | 493 (56.2)                         |
| Not applicable                                   | 62 (7.1)                           |
| Fall/Winter season                               | 592 (67.5)                         |
| Temperature >38.4°C <sup>a</sup>                 | 402 (46.3)                         |
| Percutaneous oxygen saturation <95% <sup>b</sup> | 191 (25.1)                         |
| Ill appearing                                    | 146 (16.7)                         |
| Respiratory distress (any degree)                | 393 (44.8)                         |
| Chest radiograph                                 |                                    |
| No infiltrate                                    | 211 (24.1)                         |
| Infiltrate                                       | 604 (68.9)                         |
| No chest radiograph                              | 62 (7.1)                           |
| WBC >15,000/mm <sup>3</sup>                      | 115 (35.5)                         |

Abbreviations: WBC, White blood cell count

<sup>a</sup>Temperature not recorded in 9 patients

<sup>b</sup>Percutaneous oxygen saturation not recorded in 115 patients

**Table 3 Supplemental Digital Content: Characteristic of Patients with Bacteremia**

| <b>Case</b> | <b>Age</b> | <b>Organism</b>                                                                              | <b>Penicillin MIC</b> | <b>Initial Antibiotic</b>  | <b>Blood Culture Directed Changes in Management</b>                                                                | <b>Final Antibiotic</b> |
|-------------|------------|----------------------------------------------------------------------------------------------|-----------------------|----------------------------|--------------------------------------------------------------------------------------------------------------------|-------------------------|
| 1           | 10 yrs     | <i>S. pneumoniae</i> (serotype 19A)                                                          | 0.125                 | Ampicillin<br>Erythromycin | Changed to vancomycin after initial positive blood culture; Changed to cefotaxime after final blood culture result | Amoxicillin             |
| 2           | 5 yrs      | <i>S. aureus</i> (methicillin-resistant)                                                     | N/A                   | Ampicillin                 | Added vancomycin after final blood culture result                                                                  | Linezolid               |
| 3           | 4 yrs      | <i>S. pneumoniae</i> (serotype 9N)                                                           | 0.032                 | Ampicillin-Sulbactam       | Discontinued vancomycin after final blood culture result                                                           | Ampicillin              |
| 4           | 10 mo      | <i>S. pneumoniae</i> (serotype 3)                                                            | 0.064                 | Amoxicillin                | None                                                                                                               | Amoxicillin             |
| 5           | 1 yr       | <i>S. pneumoniae</i> (serotype 19A)                                                          | 0.125                 | Vancomycin<br>Cefotaxime   | Vancomycin discontinued after organism sensitivity information became available                                    | Clindamycin             |
| 6           | 11 mo      | <i>H. influenzae</i> ( <i>non-typable</i> )                                                  | N/A                   | Vancomycin<br>Ceftazidime  | Changed to ampicillin after final blood culture result                                                             | Amoxicillin             |
| 7           | 6 yrs      | <i>Staphylococcus hominus</i> <sup>a</sup><br><i>Staphylococcus epidermidis</i> <sup>a</sup> | N/A                   | Ceftazidime                | None                                                                                                               | Clindamycin             |
| 8           | 3 yrs      | <i>Staphylococcus epidermidis</i> <sup>a</sup>                                               | N/A                   | Amoxicillin                | None                                                                                                               | Amoxicillin             |

|   |      |                                               |     |            |                                                                                                                         |             |
|---|------|-----------------------------------------------|-----|------------|-------------------------------------------------------------------------------------------------------------------------|-------------|
| 9 | 2yrs | Coagulase negative<br><i>Staphylococcus</i> * | N/A | Ampicillin | Added Vancomycin after initial<br>positive blood culture<br>Discontinued Vancomycin after<br>final blood culture result | Amoxicillin |
|---|------|-----------------------------------------------|-----|------------|-------------------------------------------------------------------------------------------------------------------------|-------------|

---

Abbreviations: MIC, minimum inhibitory concentration; N/A, not applicable

<sup>a</sup>Determined to be contaminants
